# Supplementary material
Source: publisher figshare collection journal article supplement (https://acs.figshare.com/ndownloader/files/20168402)
Supplement: Supplementary file 1 [file 20168402]

# The extended human GPCR network (hGPCRnet): cell-type-specific analysis of GPCR signaling pathways

*Avgi E. Apostolakou<sup>1</sup>, Fotis A. Baltoumas<sup>1</sup>, Dimitrios J. Stravopodis<sup>1</sup> and Vassiliki A. Iconomidou<sup>1,\*</sup>*

<sup>1</sup>Section of Cell Biology and Biophysics, Department of Biology, School of Sciences,

National and Kapodistrian University of Athens, Panepistimiopolis, Athens 15701, Greece

## **Corresponding Author**

\*Assist. Prof. Vassiliki A. Iconomidou

Section of Cell Biology and Biophysics,

Department of Biology,

National and Kapodistrian University of Athens,

Panepistimiopolis, Athens 15701, Greece

Phone: +30 210 727 4871

Fax: +30 210 7274254

e-mail: [veconom@biol.uoa.gr](mailto:veconom@biol.uoa.gr)

# Supporting Information

---

## Table of contents

### PDF Manual for the application hGPCRnet

**Figures S 1-16:** The clusters as they resulted from cluster analysis of hGPCRnet using the MCODE clustering algorithm. The Gene name from UniProtKB is used as label for the nodes.

**Table S1:** Nodes in hGPCRnet and basic information about them

**Table S2:** Protein interactions and the dataset(s) they originate from.

**Table S3:** Information about cell types and cell-type-specific networks.

**Table S4:** Cell-type-specific networks.

**Table S5:** GO term enrichment results for hGPCRnet.

**Table S6:** GO term enrichment results per cell-type-specific network.

**Table S7:** GO term enrichment results per Cluster.

**Table S8:** Disease term enrichment results hGPCRnet.

**Table S9:** Disease term enrichment results per cell type.

**Table S10:** Disease term enrichment results per Cluster

## Supporting figures

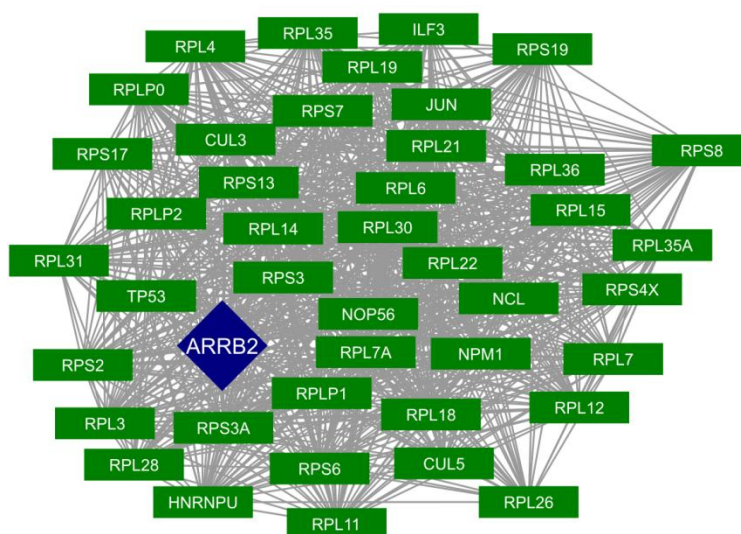

Figure S 1

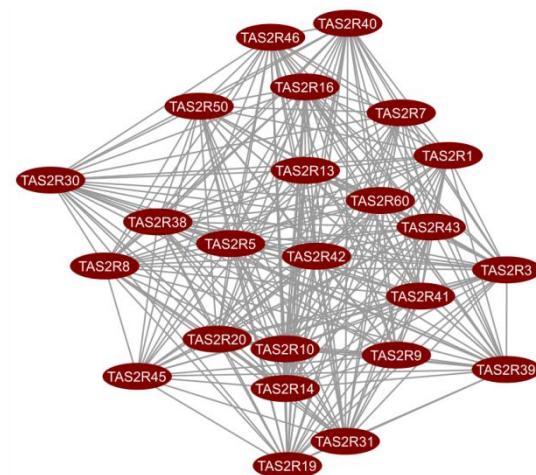

Figure S 2

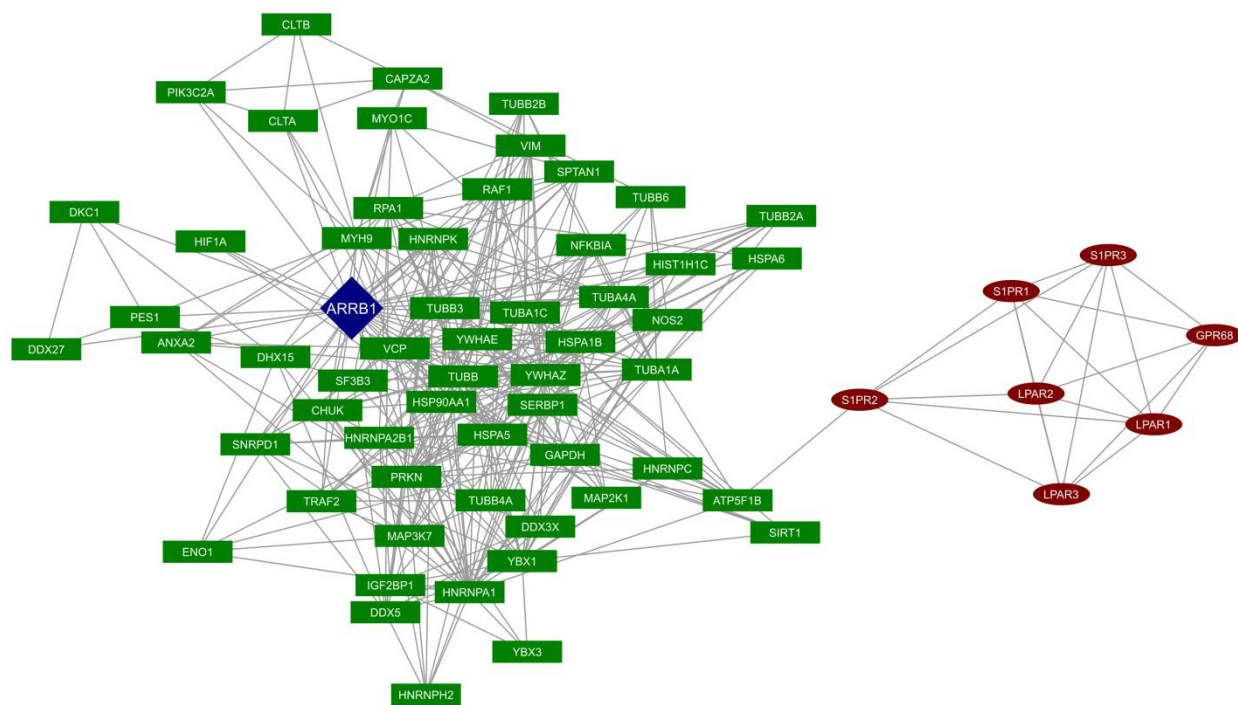

Figure S 3

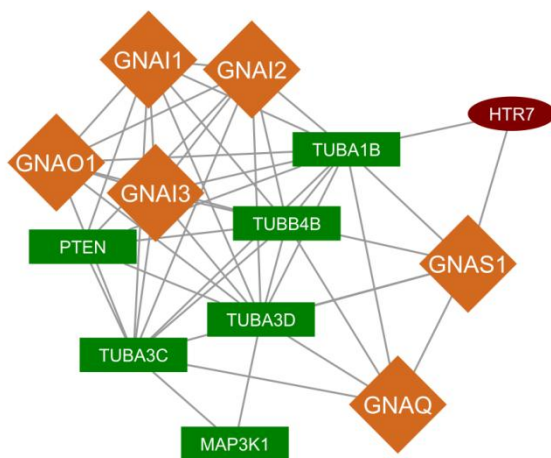

Figure S 4

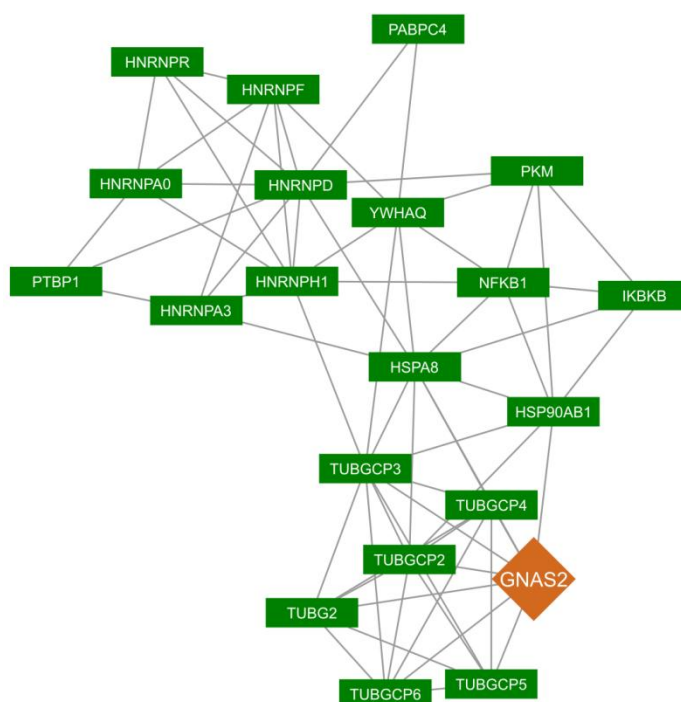

Figure S 5

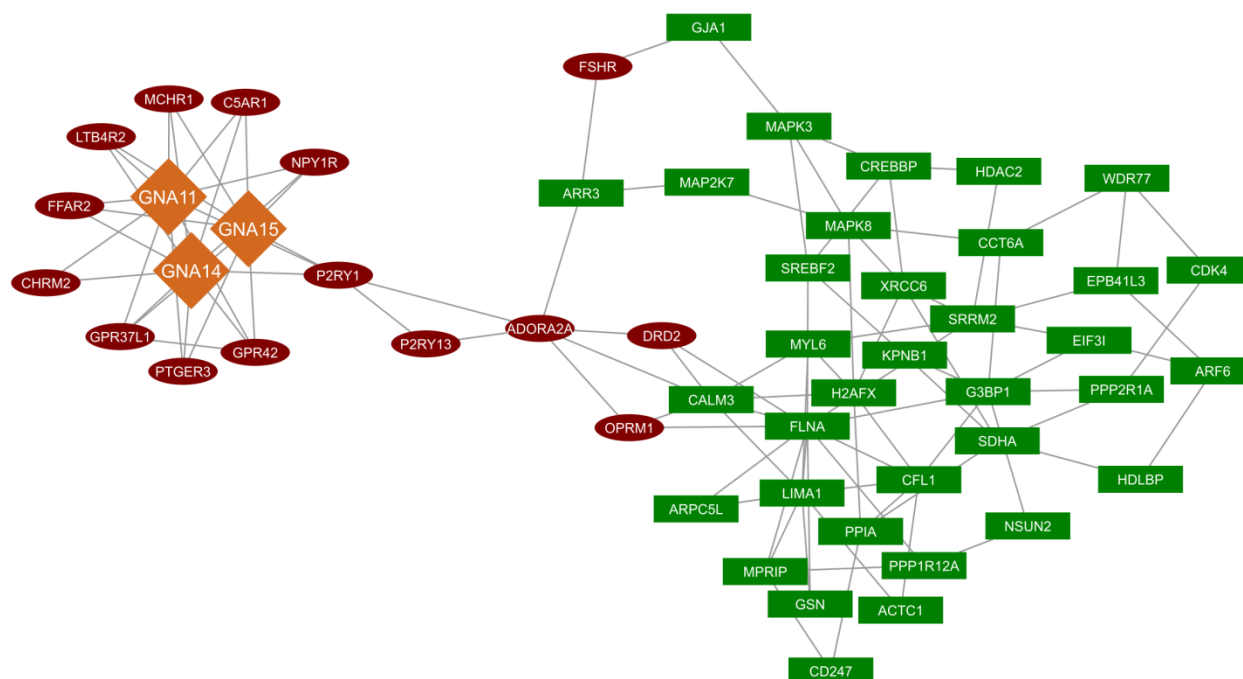

Figure S 6

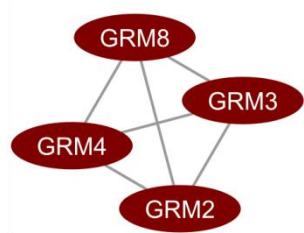

### Figure S 7

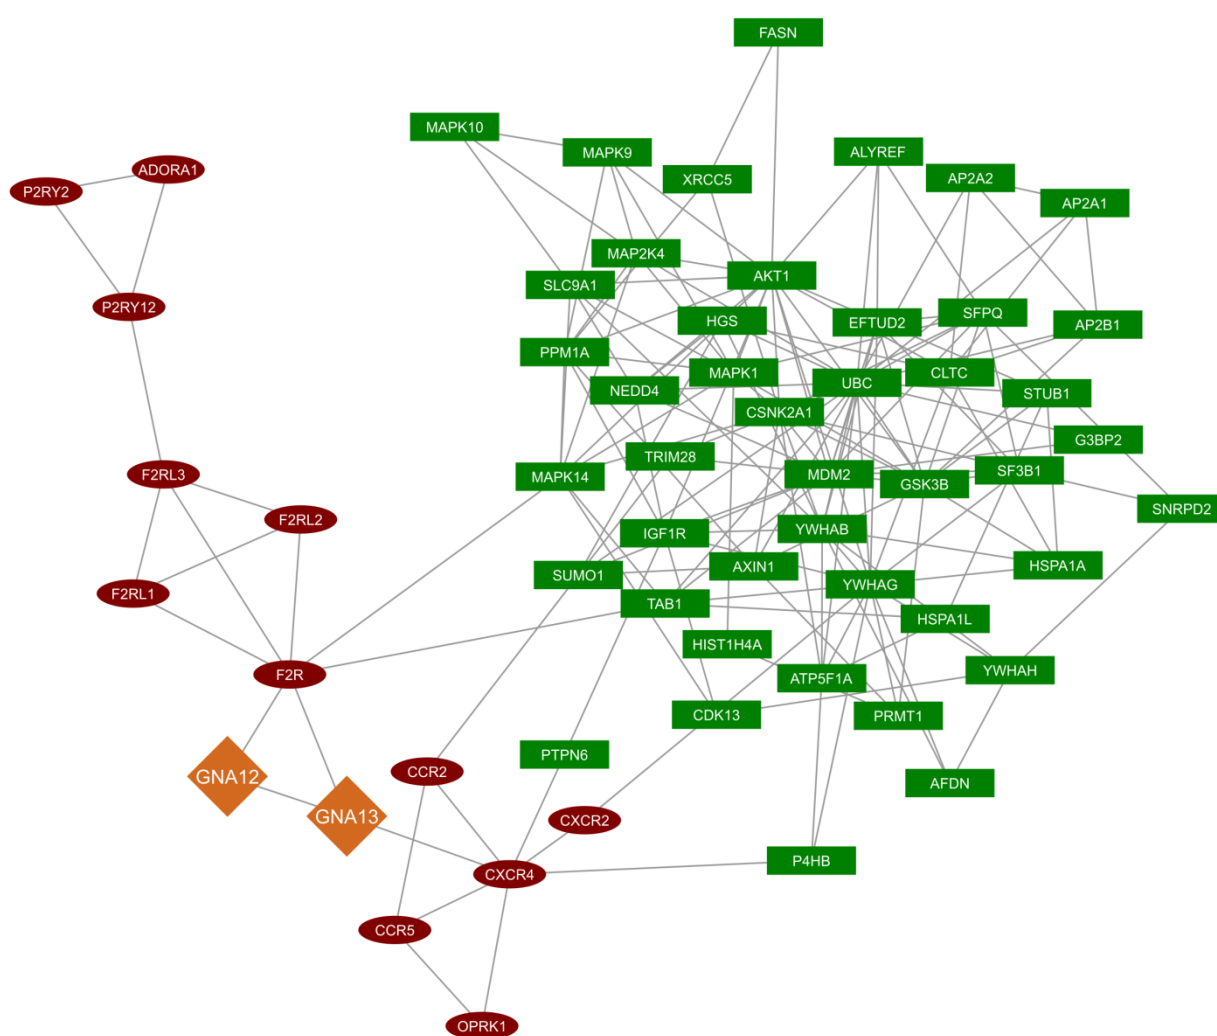

**Figure S 8**

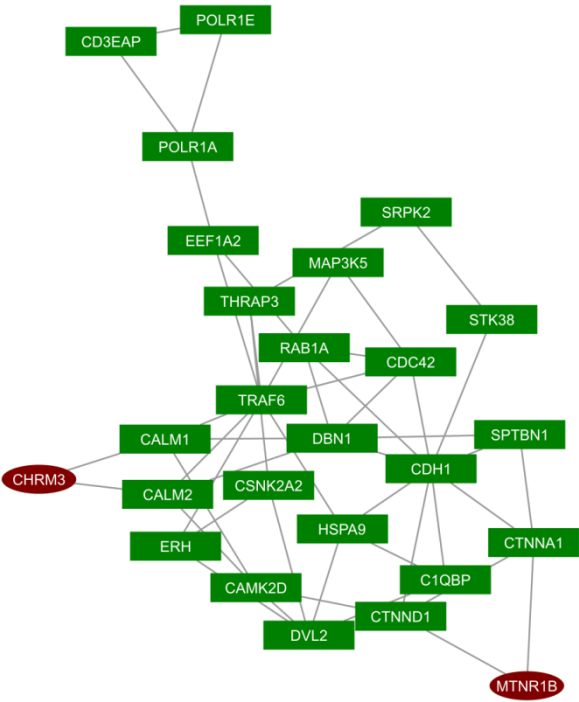

Figure S 9

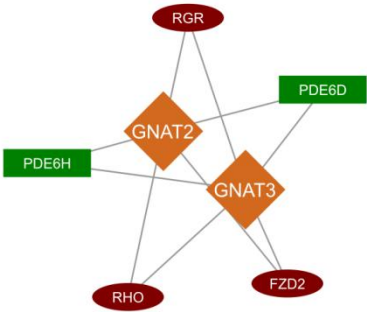

Figure S 10

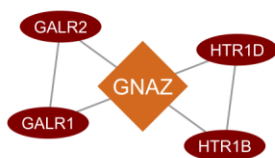

**Figure S 11**

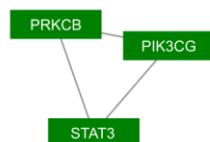

**Figure S 12**

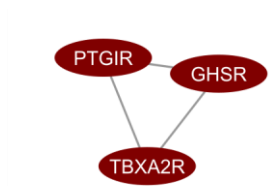

**Figure S 13**

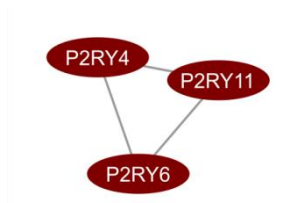

**Figure S 14**



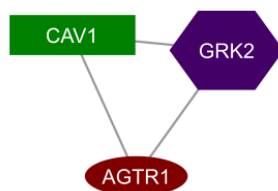

**Figure S 15**

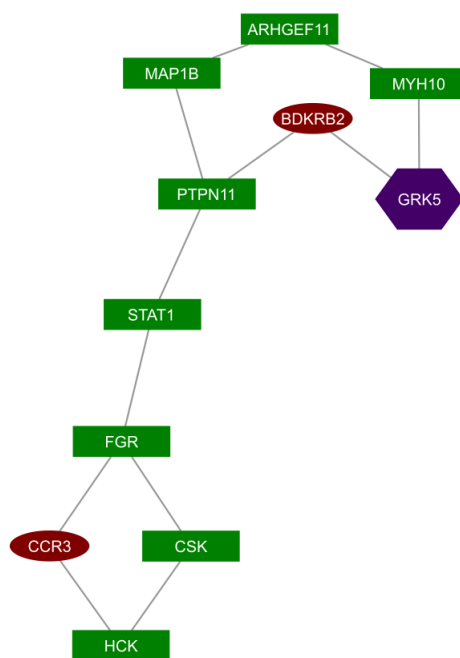

**Figure S 16**
